# Supplementary material for: Immunoglobulin-like transcript 4 and human leukocyte antigen-G interaction promotes the progression of human colorectal cancer
Source: PubMed Central journal article supplement — Int J Oncol. 2019 Mar 22;54(6):1943–54. doi: 10.3892/ijo.2019.4761 (PMC6521940; doi:10.3892/ijo.2019.4761), 2019-03-22
Supplement: IJO-54-06-1943-Supplementary_Data.pdf [file IJO-54-06-1943-Supplementary_Data.pdf]

Figure S1. Overexpression sequence of immunoglobulin-like transcript 4.

GATCCGCTAGCGCTACCGACTCAGATCTCGAGCGCCACCATGACCCCA  
TCGTCACAGTCTGATCTGTCTCGGGCTGAGTCTGGGCCCAGGACCCAC  
GTGCAGACAGGGACCATCCCAAGCCCACCCTGTGGGCTGAGCCAGACTC  
TGTGATCACCCAGGGGAGTCCCGTACCCCTCAGTTGTCAGGGGAGCCTTG  
AAGCCCAGGAGTACCGTCTATATAGGGAGAAAAATCAGCATCTTGGATT  
ACACGGATACGACCAGAGCTTGTGAAGAACGGCCAGTCCACATCCCATC  
CATCACCTGGGAACACACAGGGCGATATGGCTGTGAGTATTACAGCCGCG  
CTCGGTGGTCTGAGCTCAGTGACCCCTGGTGTGGTGTGACAGGAGCC  
TACCCAAAACCCACCCTCTCAGCCCAGCCAGCCCTGTGGTGACCTCAGG  
AGGAAGGGTGACCCTCCAGTGTGAGTACAGGTGGCATTGGCGGCTTCA  
TTCTGTGTAAGGAAGGAGAAGATGAACCCACAATGCCTGAACTCCCAG  
CCCCATGCCGTGGGTCGTCGCCGCGCATCTTCTCCGTGGGCCCCGTGAGC  
CCGAATCGCAGGTGGTCCGACAGGTGCTATGGTTAGACTTGAACCTCC  
CTATGTGTGGTCTTACCCAGTGTCTCTGGAGCTCCTGGTCCAGGTGT  
TTCTAAGAAGCCATCACTCTCAGTGCAGCCGGTCTGTGCGGCCCTGG  
GGAAAGCCTGACCCTCCAGTGTGTCTGTATGTCGGCTATGACAGATTGT  
TCTGTACAAGGAGGGGGAACGTGACCTTCGCCAGCTCCCTGGCCGCGAGC  
CCCAGGTGGGCTCTCCAGGCCAACTTACCCTGGGCCCTGTGAGCCGC  
TCCTACGGGGGCCAGTACAGATGCTACGGTGATACAACCTCTCCTCCGA  
GTGGTGGGCCCCAGCGACCCCTGGACATCCTGATCACAGGACAGATCC  
ATGGCACACCCTTCACTCAGTGCAGCCAGGCCACAGTGGCCTCAGGA  
GAGAACGTGACCCTGTGTGTCAGTATGGCGGAGTCCACACTTTCCTT  
CTGACCAAGGCGGGAGCAGCTGATGCCCACTCCGTCTAAGATCAATACA  
CGAATATCCTAAGTACCAGGCTGAATCCCCATGAGTCTGTGACCTCAG  
CCCACGCGGGGACCTACAGGTGCTACGGTCACTCAACTCCGACCCTAC  
CTGTGTCTCACCCAGTGCAGCCCTGGAGCTCGTGGTCTCAGGACCCTCC  
ATGGGTTCCAGCCCCCACCACCGTCCCATCTCCACACCTGCAGGCCCT  
GAGGACCAGCCCTCACCCCACTGGGTCGGATCCCCAAAGTGGTCTGGG  
AAGGCACCTGGGGTTGTGATCGGCATCTTGGTGGCGTCGTCTACTGCT  
CCTCCTCCTCCTCCTCTTCTCATCTCCGACATCGACGTCAGGGCAA  
ACACTGGACATCAACCCAGAGAAAGGCTGATTTCCAACATCCTGCAGGGG  
CTGTGGGGCCAGAGCCACAGACAGAGGCCCTGCAGTGGAGGTCCAGCCC  
AGCTGCCAGCCAGGAAGAAAACCTCTATGCTGCCGTGAAGGACACAC  
AGCCTGAAGATGGGGTGGAGATGGACACTCGGGCTGCTGCATCTGAAGCC  
CCCCAGGATGTGACCTACGCCAGCTGCACAGCTTGACCCTCAGACGGAA  
GGCAACTGAGCCTCCTCCATCCCAGGAAGGGGAACCTCCAGCTGAGCCCA  
GCATCTACGCCACCCTGGCCATCCACACGGTACCGGGGCCGGGATCCA
